# Supplementary material for: How can we better integrate the prevention, treatment, control and elimination of neglected tropical diseases with other health interventions? A systematic review
Source: PubMed Central journal article supplement — BMJ Glob Health. 2021 Oct 18;6(10):e006968. doi: 10.1136/bmjgh-2021-006968 (PMC8524265; doi:10.1136/bmjgh-2021-006968), 2021-10-18
Supplement: bmjgh-2021-006968supp001.pdf [file bmjgh-2021-006968supp001.pdf]

## Appendix 1: Full EMBASE search strategy

1. (Chagas disease and (Management or treatment or prevention or control or restrict\*) and (integrat\* or Combin\*)).af

### Chikungunya

1. ((Chikungunya management or treatment or prevention or control) and integrat\*).m\_titl

### Cysticercosis

((Cysticercosis management or treatment or prevention or control) and integrat\*).mp. [mp=title, abstract, original title, name of substance word, subject heading word, floating sub-heading word, keyword heading word, organism supplementary concept word, protocol supplementary concept word, rare disease supplementary concept word, unique identifier, synonyms]

### Dengue

1. ("Dengue fever" and (Management or treatment or prevention or control or Restrict\*) and (integrat\* or Combin\*)).af.

### Dracunculiasis

1. ("Dracunculuasis" or "Guinea worm disease" or "guinea worm").m\_titl.  
2. ("Guinea worm disease" or "guinea worm" or "Dracunculiasis").mp. [mp=title, abstract, original title, name of substance word, subject heading word, floating sub-heading word, keyword heading word, organism supplementary concept word, protocol supplementary concept word, rare disease supplementary concept word, unique identifier, synonyms]  
3. ("Management" or "treatment" or "prevention" or "control").m\_titl.  
4. (integrat\* or combin\*).m\_titl.  
5. 1 and 2 and 3 and 4

### Echinococcosis

1. ("Management" or "treatment" or "prevention" or "control").m\_titl.  
2. (integrat\* or combin\*).m\_titl.  
3. Echinococcosis.m\_titl.  
4. 1 and 2 and 3

### fascioliasis

1. (Fascioliasis and (Management or treatment or prevention or control or Restrict\*) and (integrat\* or Combin\*)).af.

### Leishmaniasis

1. (Leishmaniasis and (Management or treatment or prevention or control or Restrict\*) and (integrat\* or Combin\*)).af.

### leprosy

1. (("Leprosy" or "Hansen's disease") and (Management or treatment or prevention or control or Restrict\*) and (integrat\* or Combin\*)).af.

### mycetoma

1. ("Mycetoma" or "Chromoblastomycosis" or "Madura Foot" or "eumycetoma\*" or "mycetomapedis" or "actinomycetoma\*") and (Management or treatment or prevention or control or Restrict\*) and (integrat\* or Combin\*).af.

### onchocerciasis

1. ("Onchocerciasis" or "River blindness") and (Management or treatment or prevention or control or Restrict\*) and (integrat\* or Combin\*).af

### podoconiosis

1. ("Podoconiosis" or "nonfilarial elephantiasis") and (Management or treatment or prevention or control or Restrict\*) and (integrat\* or Combin\*).af.

### scabies

1. (scabies and (Management or treatment or prevention or control or Restrict\*) and (integrat\* or Combin\*).af.

### Schistosomiasis

1. ("Schistosomiasis" or "Bilharzia") and (Management or treatment or prevention or control or Restrict\*) and (integrat\* or Combin\*).af.

### sleeping sickness

1. ("Sleeping sickness" or "Human African trypanosomiasis" or "Tsetse fly disease") and (Management or treatment or prevention or control or Restrict\*) and (integrat\* or Combin\*).af.

### Snakebite

1. ("Snakebite envenoming" or "antivenins" or "snakebite\*" or "venoms" or "envenoming" or "snake poison") and (Management or treatment or prevention or control or Restrict\*) and (integrat\* or Combin\*).af.

### Soil-transmitted helminthiasis

1. ("Soil-transmitted Helminths" or "Hookworm" or "Whipworm" or "Soil-transmitted helminth\*" or "soil transmitted helminth\*" or "intestinal worm\* OR helminth" or "Helminthiasis") and (Management or treatment or prevention or control or Restrict\*) and (integrat\* or Combin\*).af.

### Strongyloidiasis

1. ("Strongyloidiasis" or "strongyloidesstercoralis" or "Strongyloidiasis") and (Management or treatment or prevention or control or Restrict\*) and (integrat\* or Combin\*).af.

## Yaws

1. (YAWS and (Management or treatment or prevention or control or Restrict\*) and (integrat\* or Combin\*)).af.
